# Supplementary material
Source: ML conference proceedings conference paper supplement (https://openreview.net/forum?id=KXmDTGKwhy)
Supplement: supplementary_material [file gqa-results-alt-legend.pdf › multimodal-representations-main/plots/gqa-results-alt-legend.pdf]

VLM

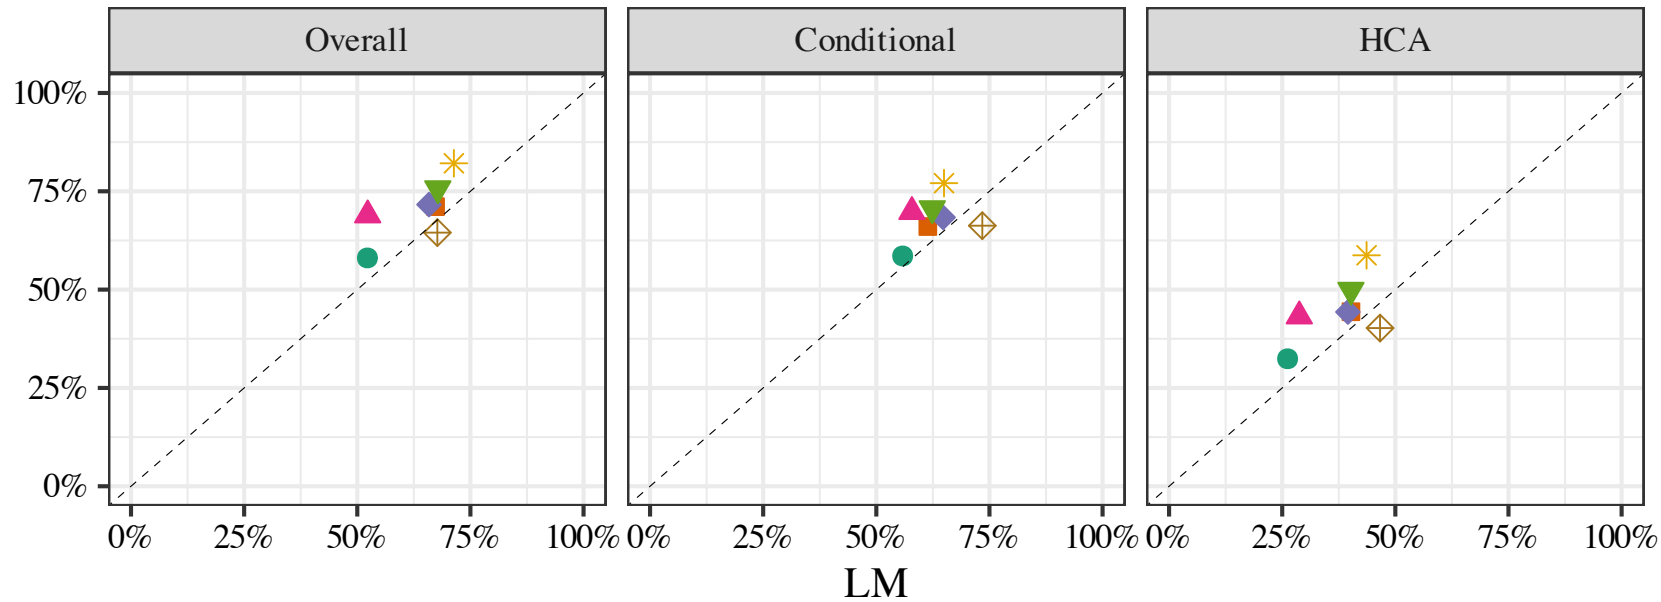

- Llama-3.1 vs. MLLama-3.2
- Llama-3.1-I vs. MLLama-3.2-I
- ◆ Mistral-v0.2-I vs. Llava-Next
- ▲ Qwen2 vs. Molmo-D
- ▼ Qwen2-I vs. Llava-OV
- ✱ Qwen2.5-I vs. Qwen2.5-VL-I
- ◊ Vicuna vs. Llava-1.5
