# Supplementary material
Source: ML conference proceedings conference paper supplement (https://openreview.net/forum?id=KXmDTGKwhy)

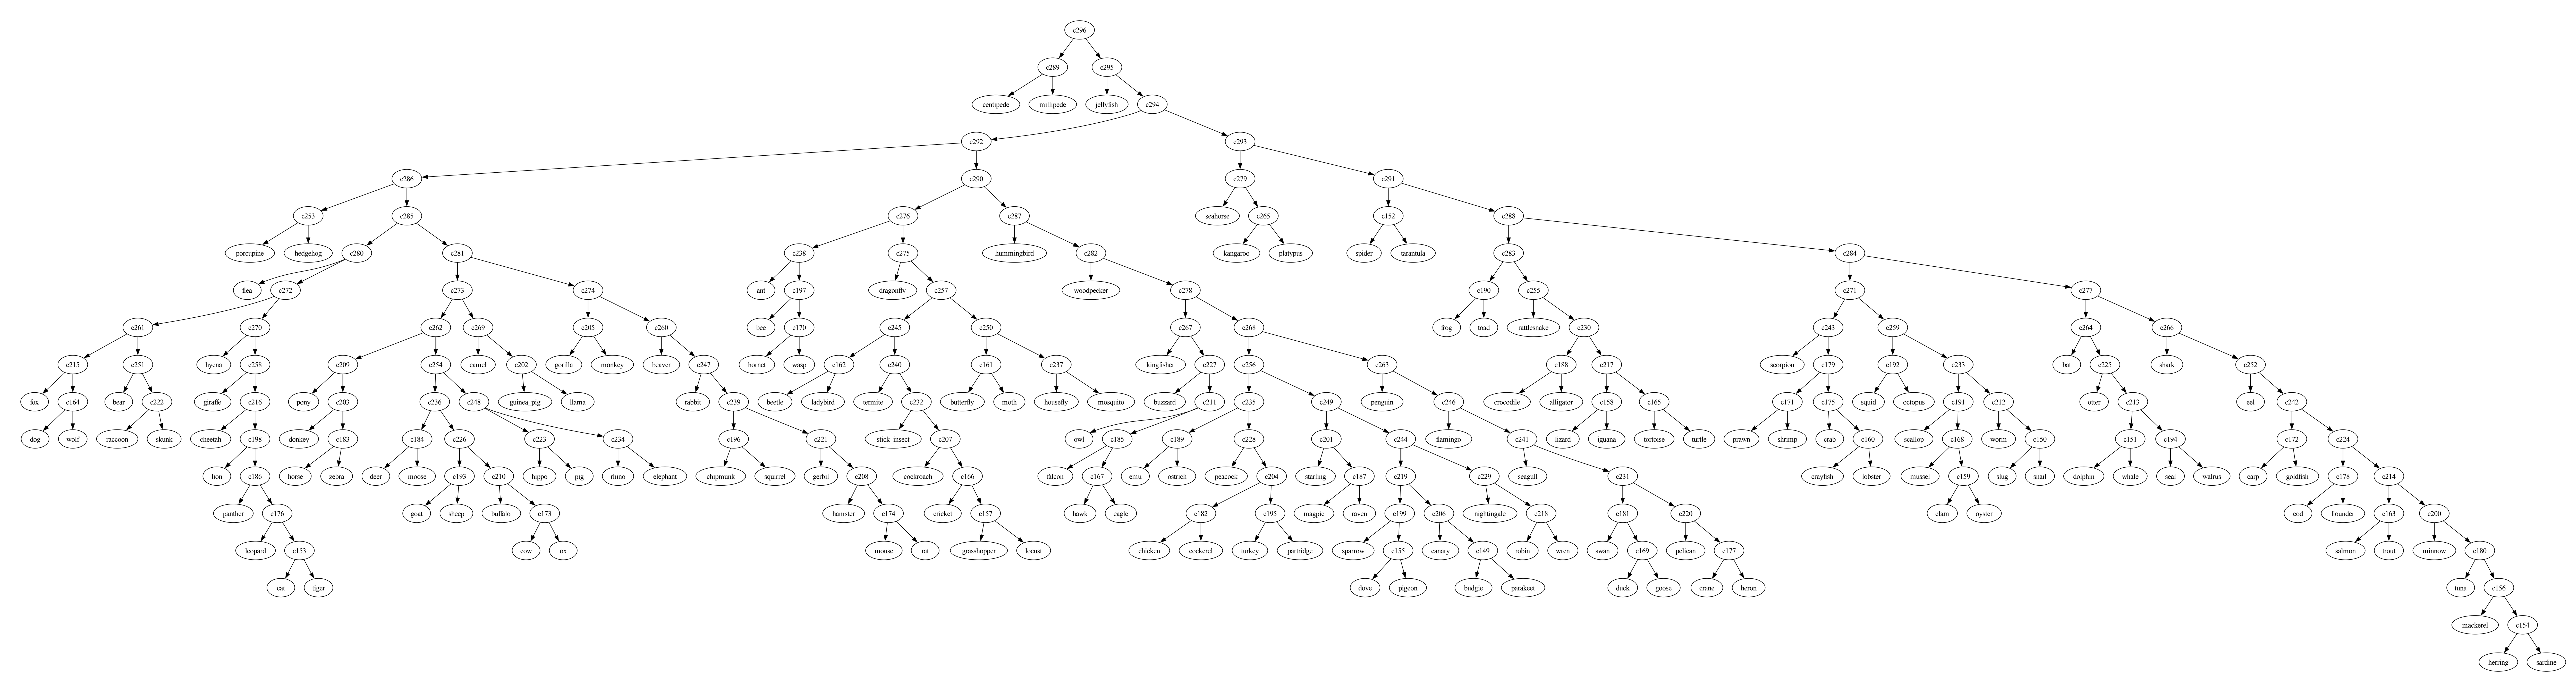

Supplement: supplementary_material [file behaviorally-induced-taxonomy-first-pass-animals.pdf › multimodal-representations-main/plots/behaviorally-induced-taxonomy-first-pass-animals.pdf]

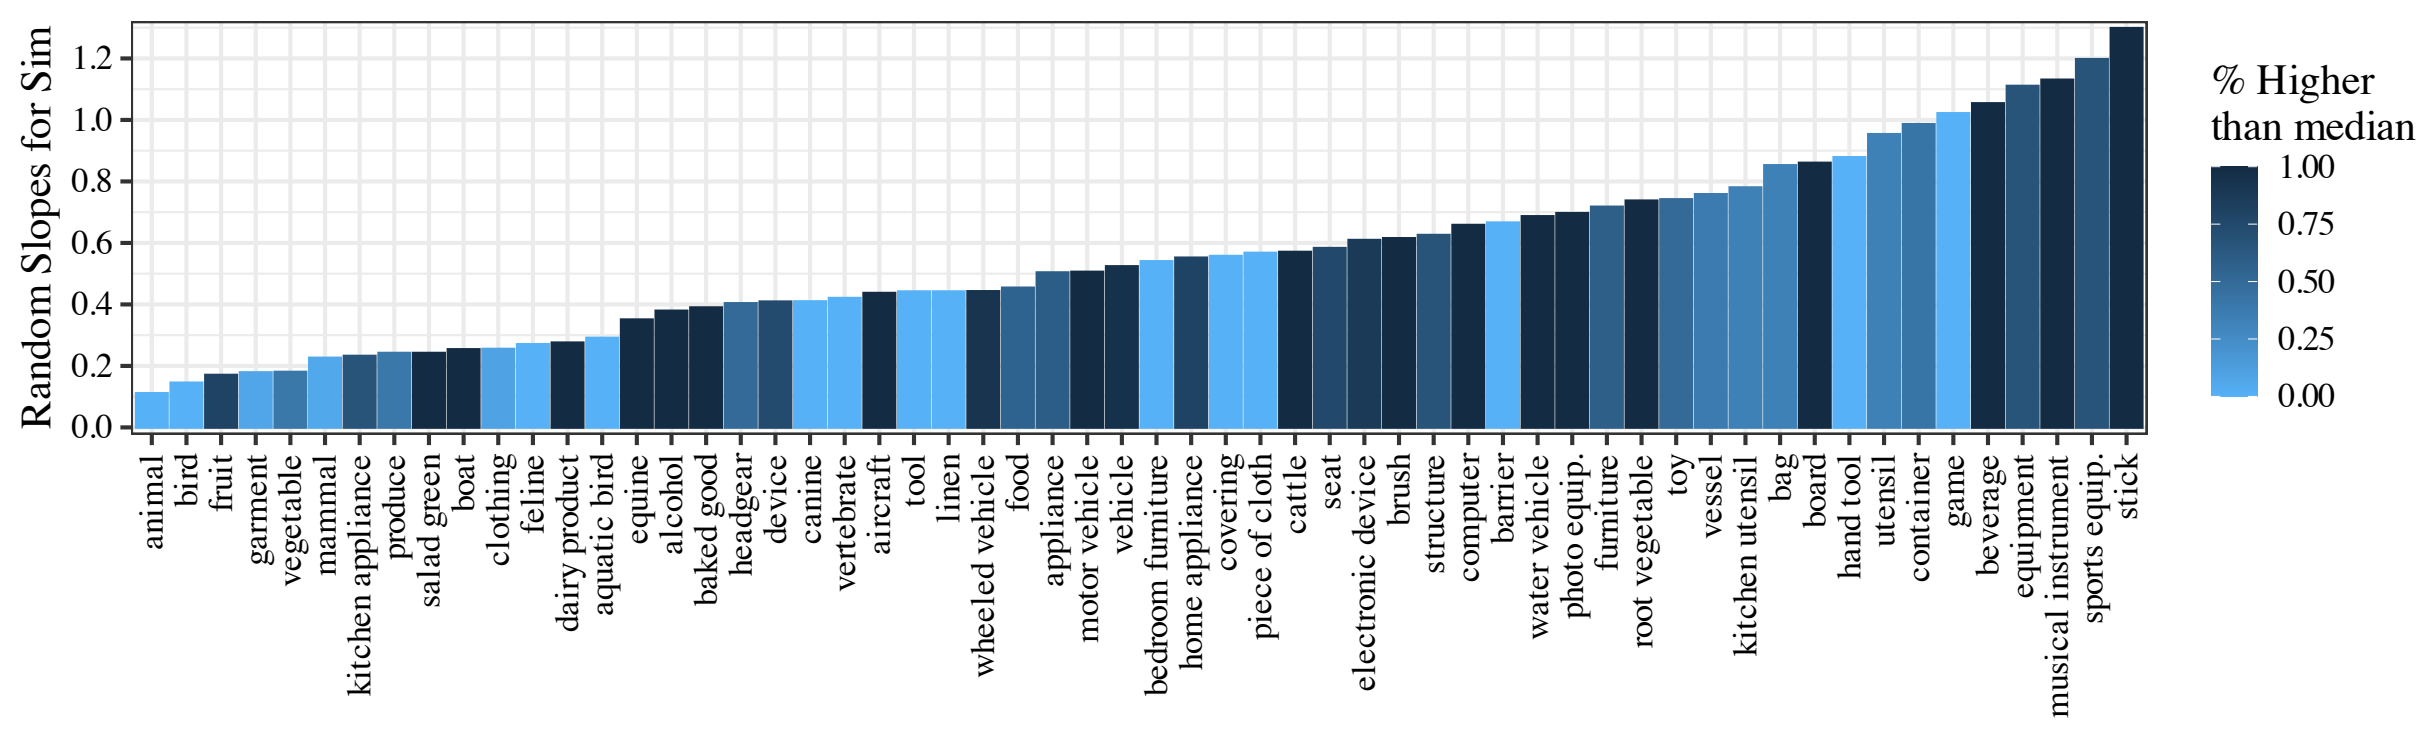

Supplement: supplementary_material [file fixed-random_effects_qwen_vlm.pdf › multimodal-representations-main/plots/fixed-random_effects_qwen_vlm.pdf]

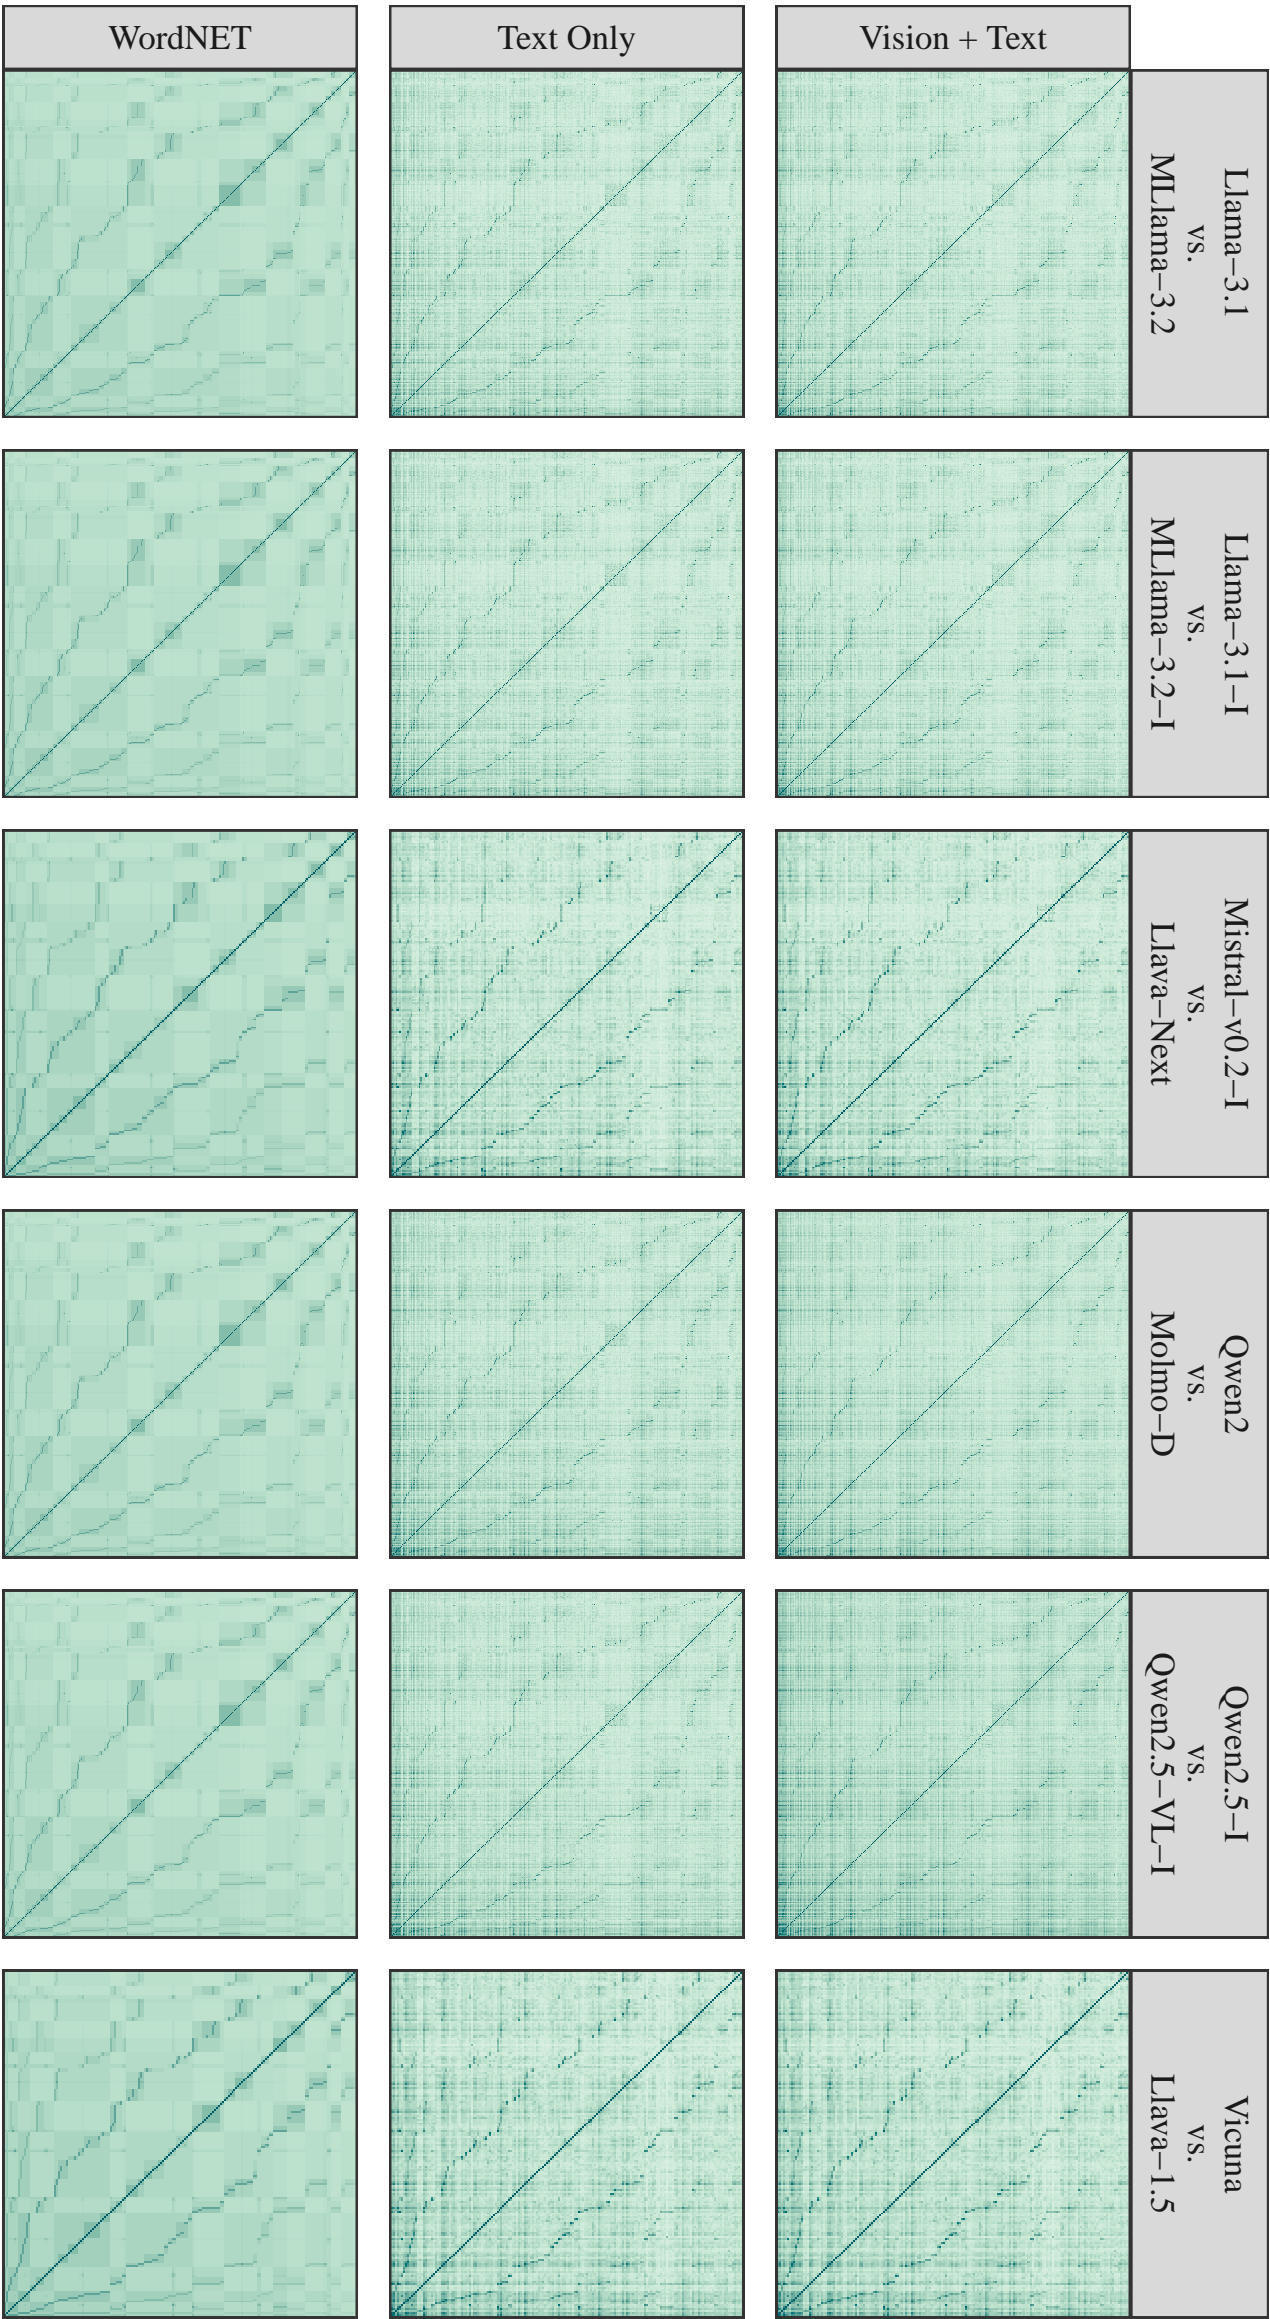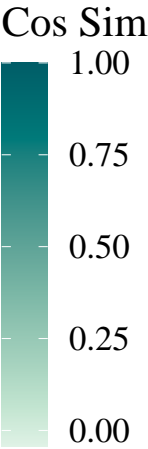

Supplement: supplementary_material [file lda-park-etal.pdf › multimodal-representations-main/plots/lda-park-etal.pdf]

Substitution    ●    Hypernym    ×    Negative

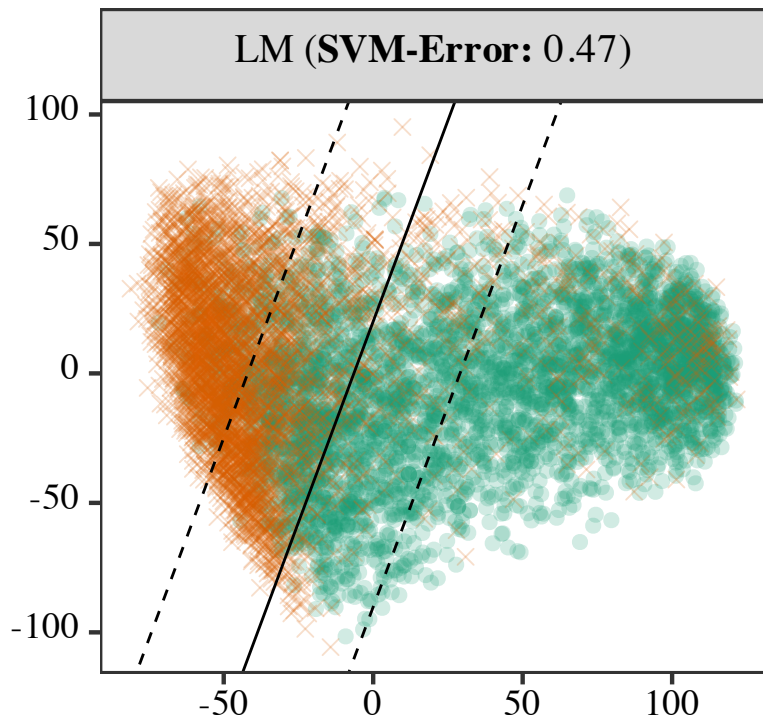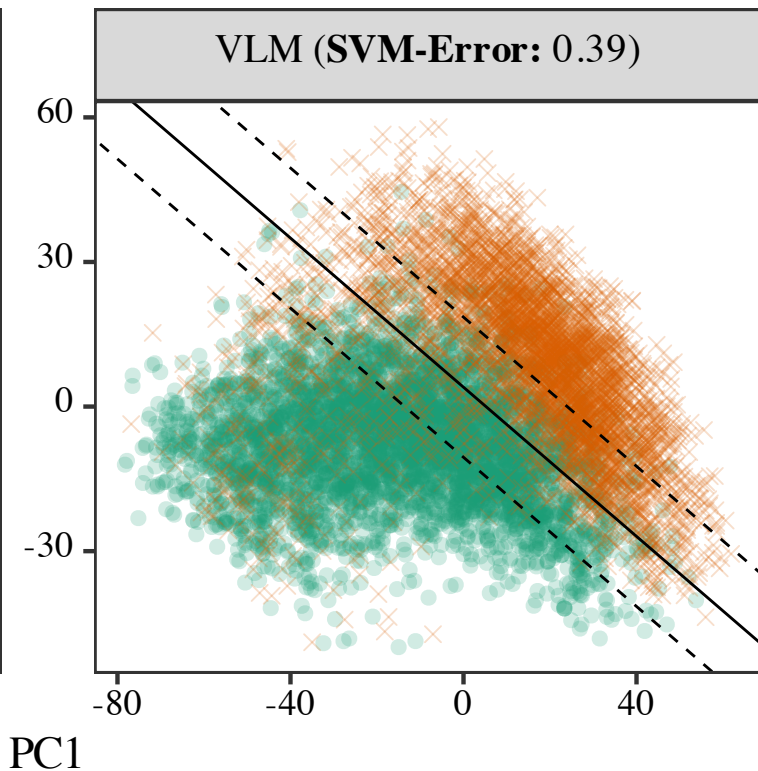

Supplement: supplementary_material [file pca-qwen-full.pdf › multimodal-representations-main/plots/pca-qwen-full.pdf]

VLM > LM

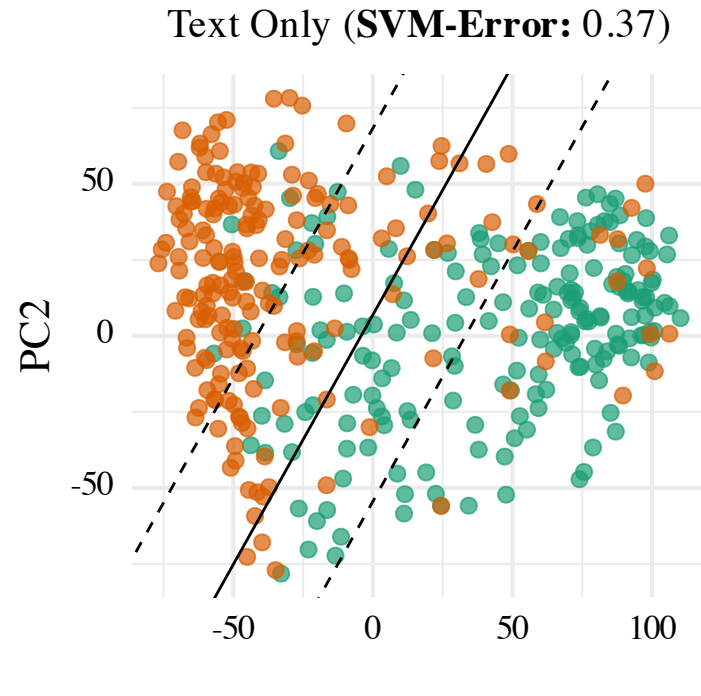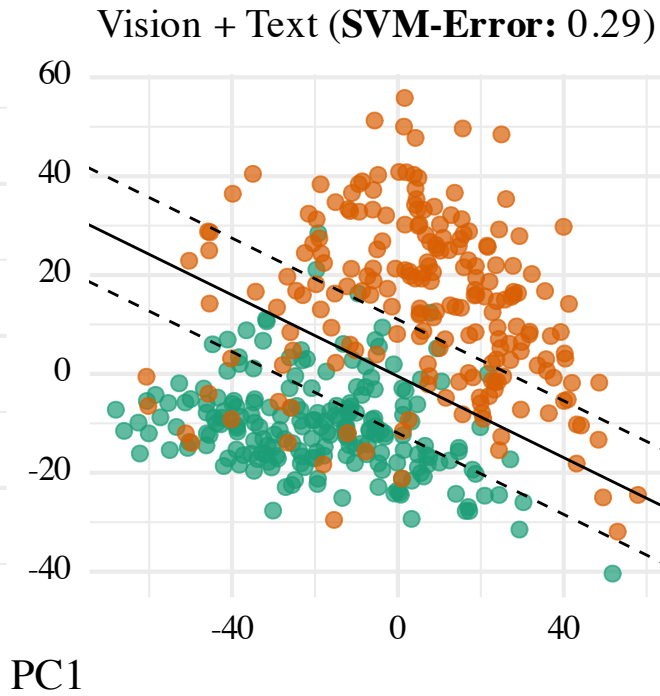

VLM ~ LM

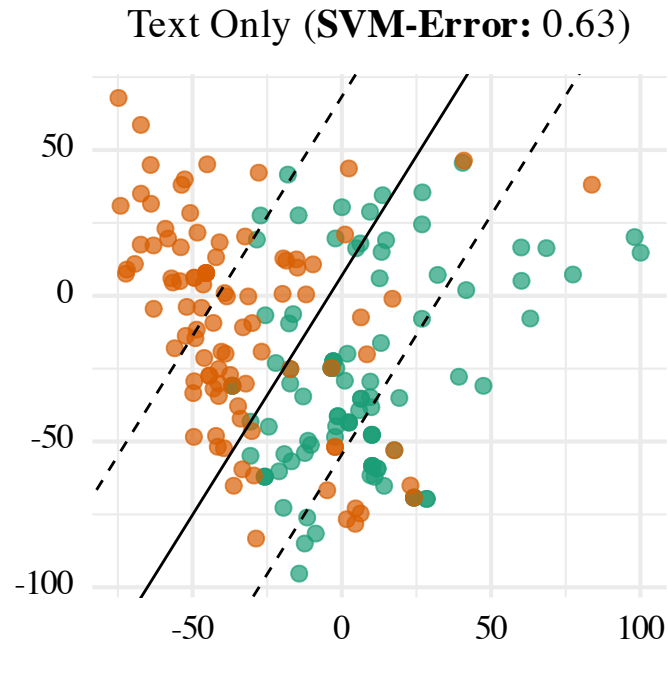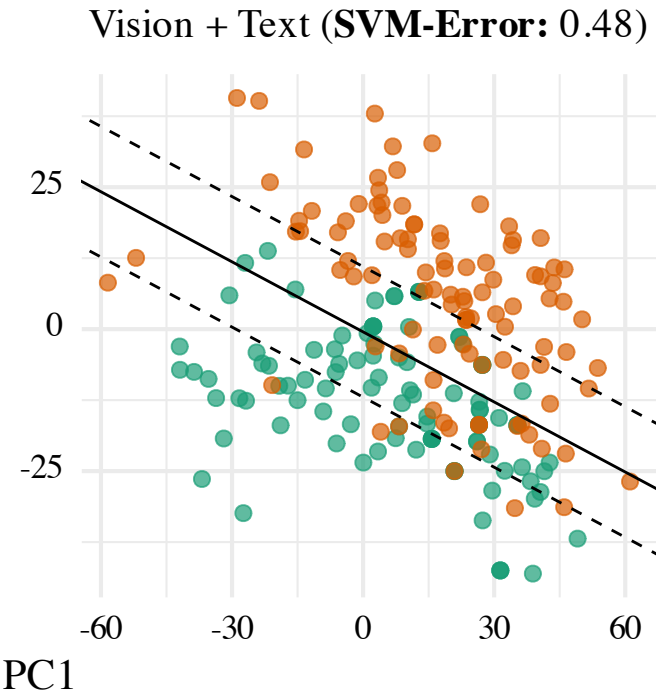

Substitution    ● Hypernym    ● Negative

Supplement: supplementary_material [file pca-qwen.pdf › multimodal-representations-main/plots/pca-qwen.pdf]

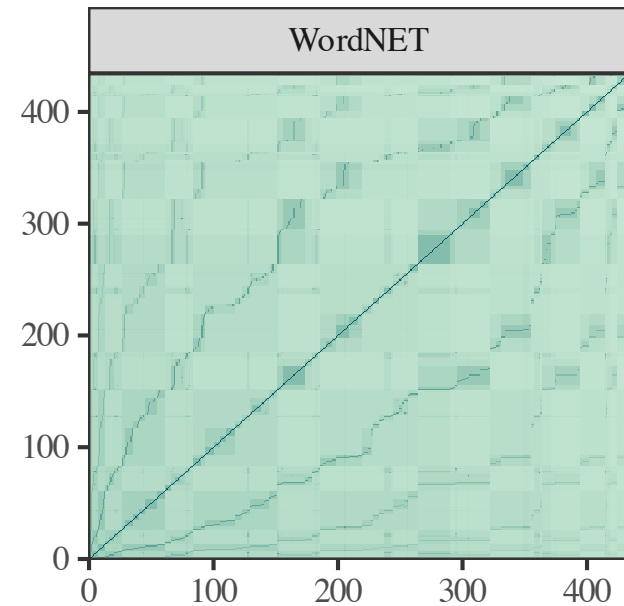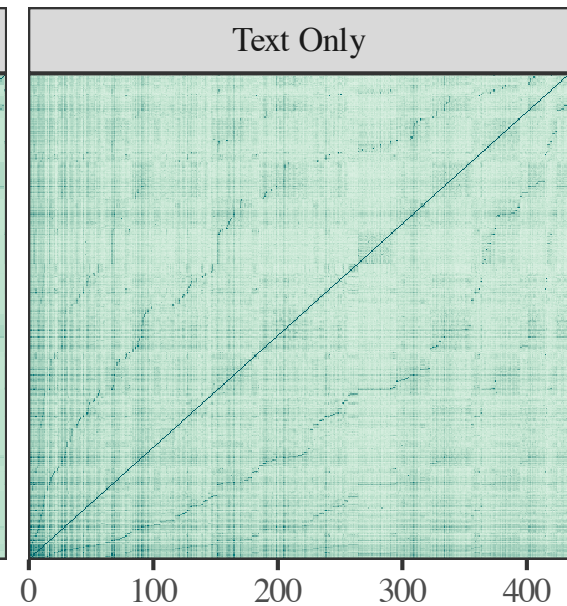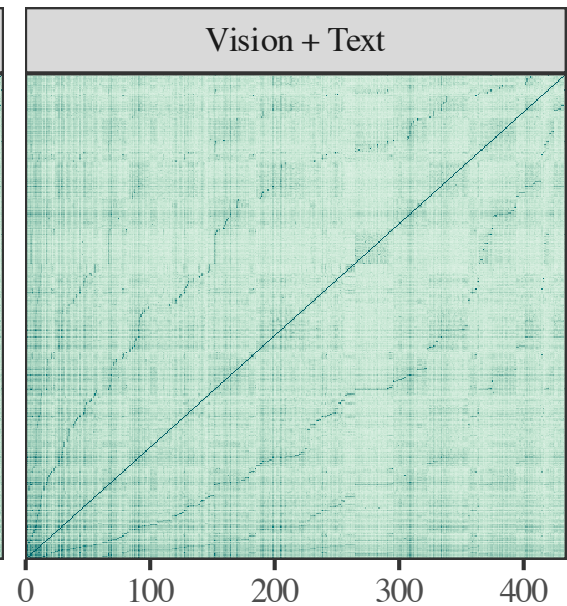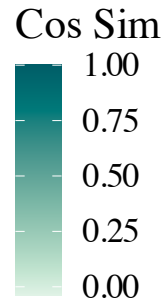

Supplement: supplementary_material [file qwen2-7b-instruct-RSA.pdf › multimodal-representations-main/plots/qwen2-7b-instruct-RSA.pdf]

WordNET

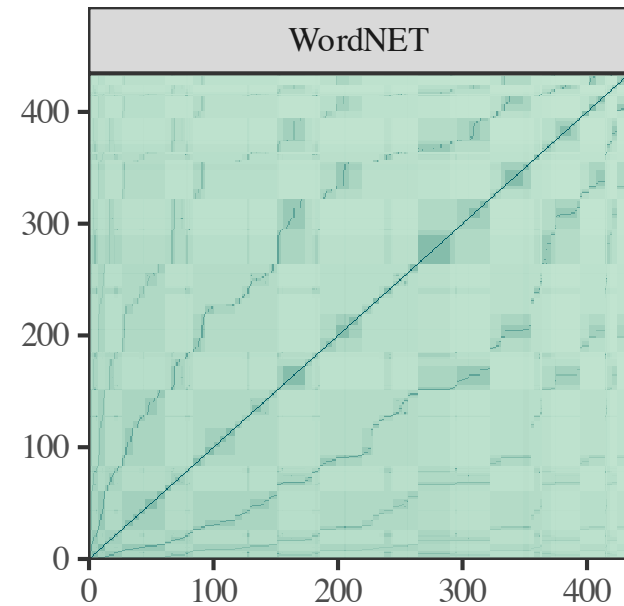

Text Only

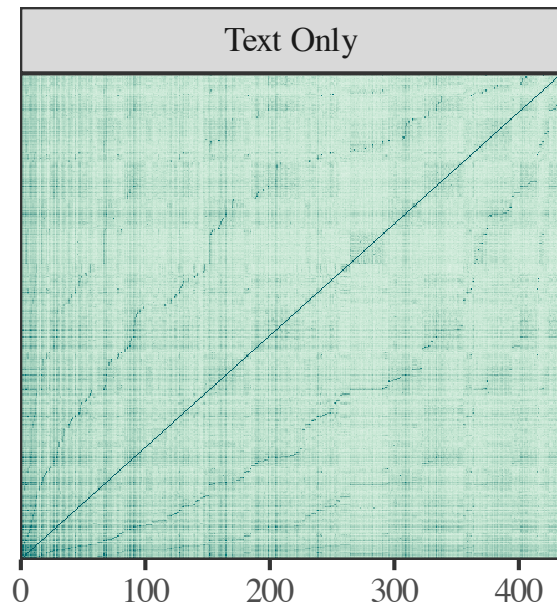

Vision + Text

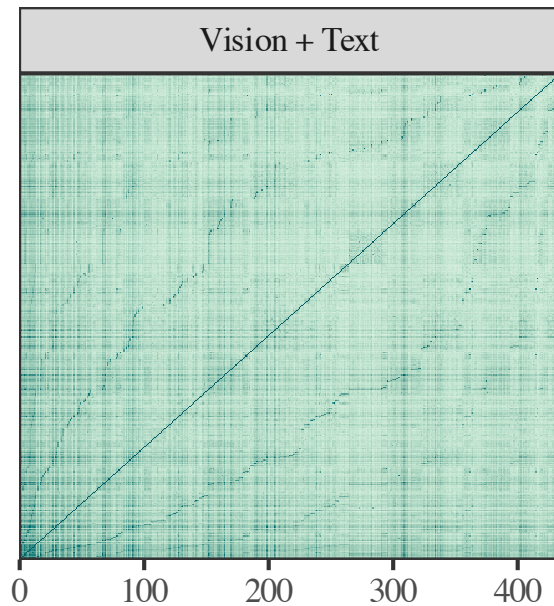

Cos Sim

1.00

0.75

0.50

0.25

0.00

Supplement: supplementary_material [file qwen2.5-instruct-RSA.pdf › multimodal-representations-main/plots/qwen2.5-instruct-RSA.pdf]

Relative Effect of Similarity

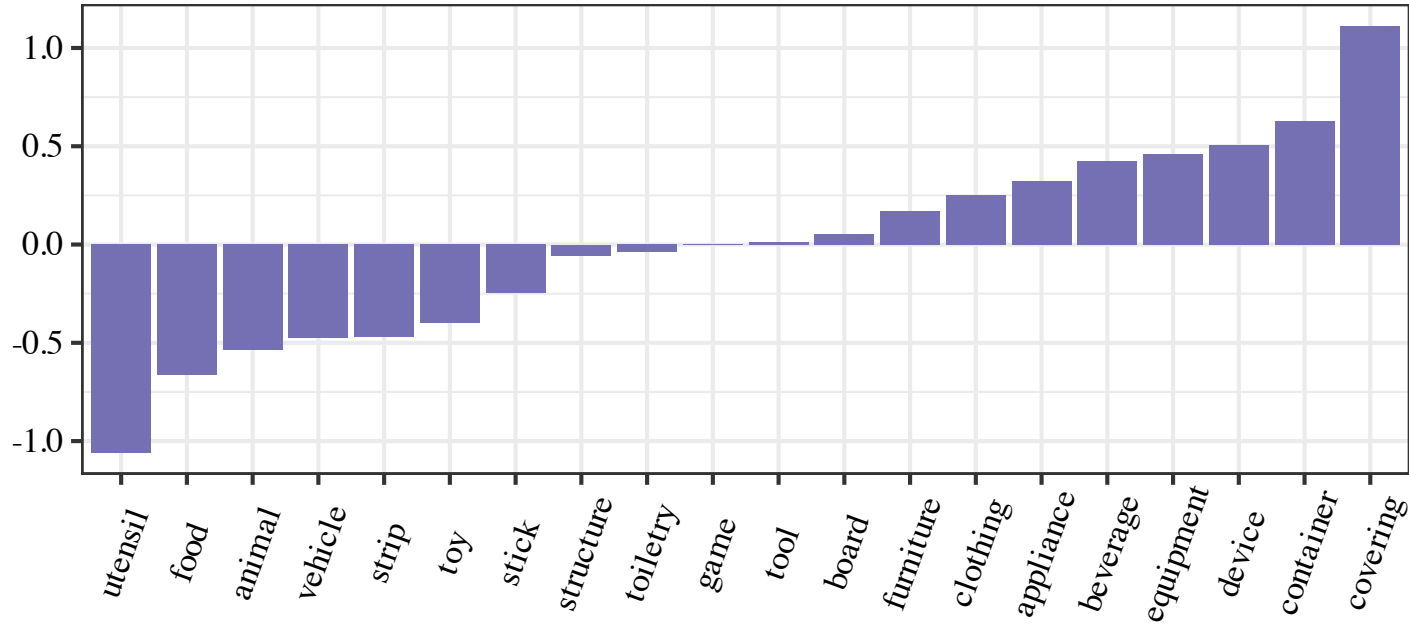

Supplement: supplementary_material [file ranef-qwen-img-sim.pdf › multimodal-representations-main/plots/ranef-qwen-img-sim.pdf]

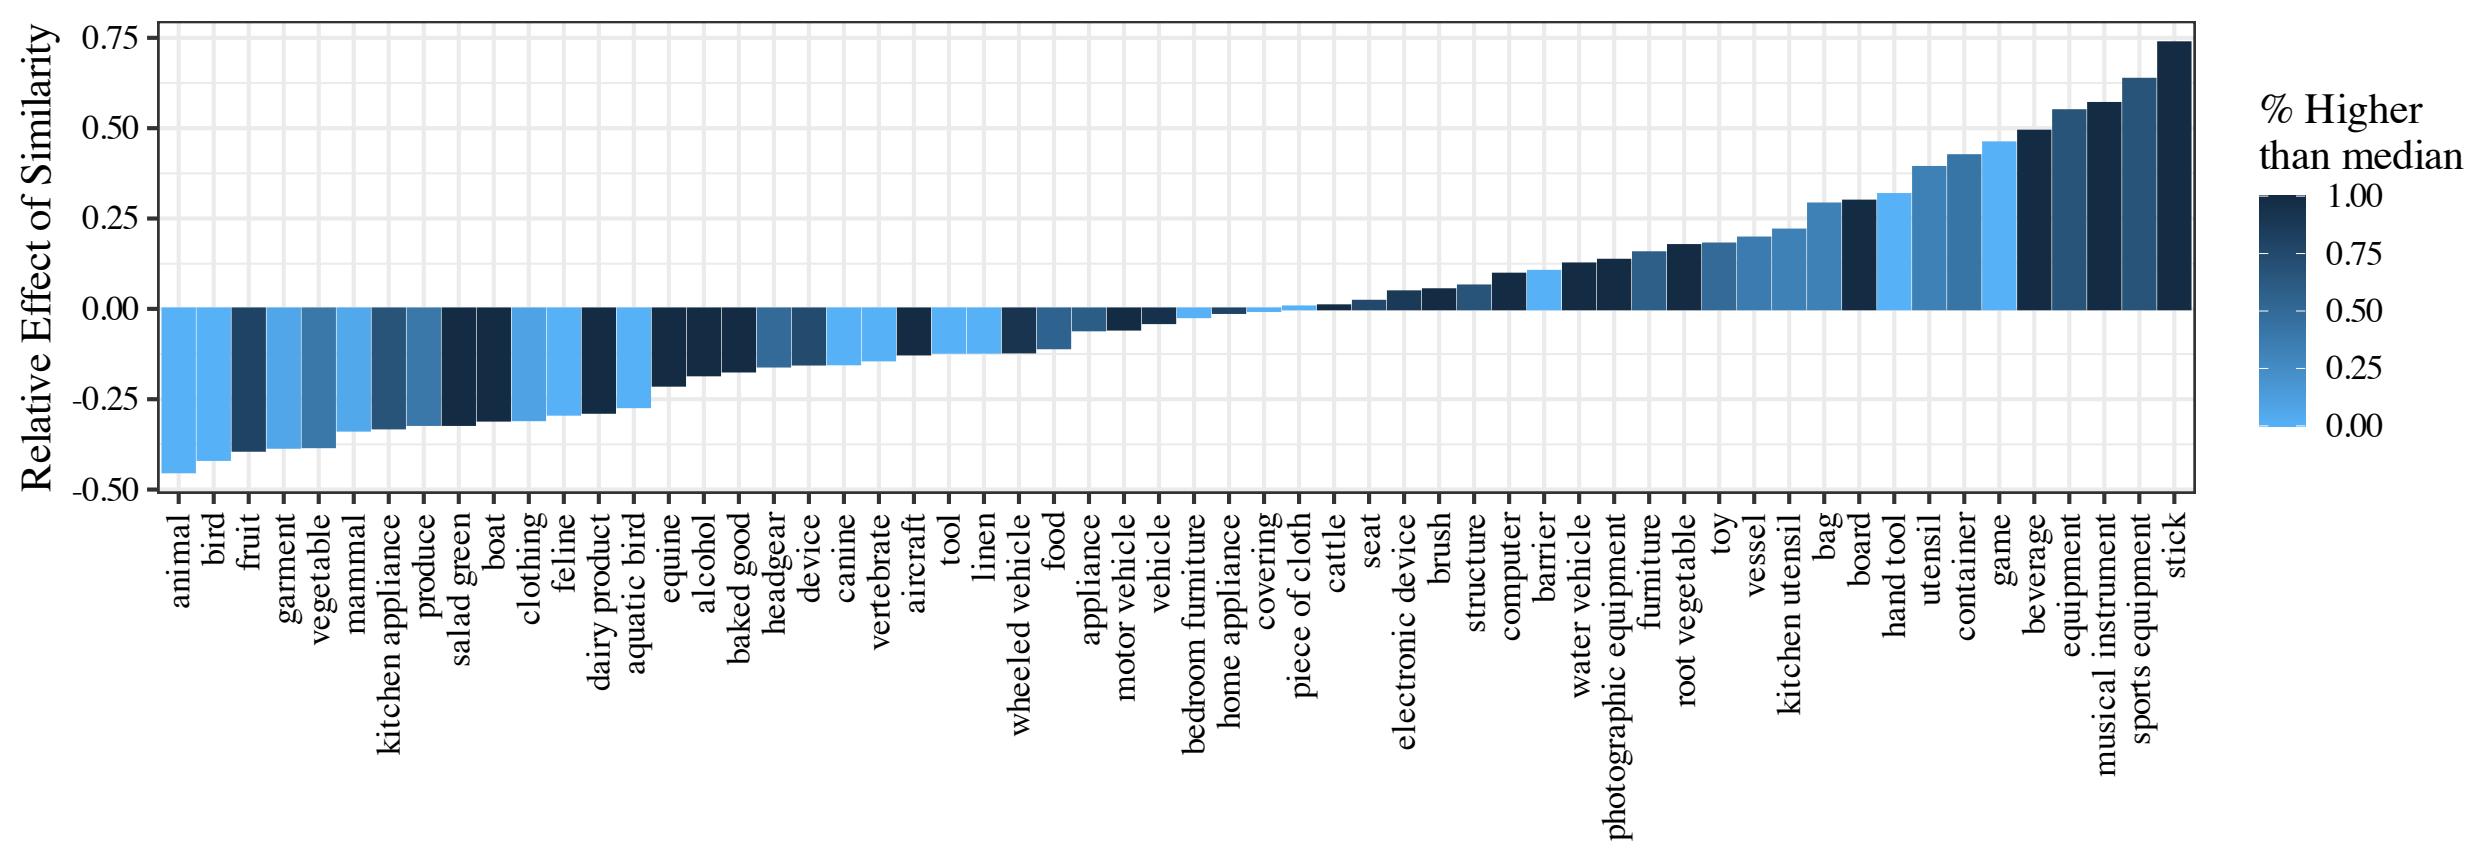

Supplement: supplementary_material [file relative_effects_qwen_vlm.pdf › multimodal-representations-main/plots/relative_effects_qwen_vlm.pdf]

Model    VLM    LM

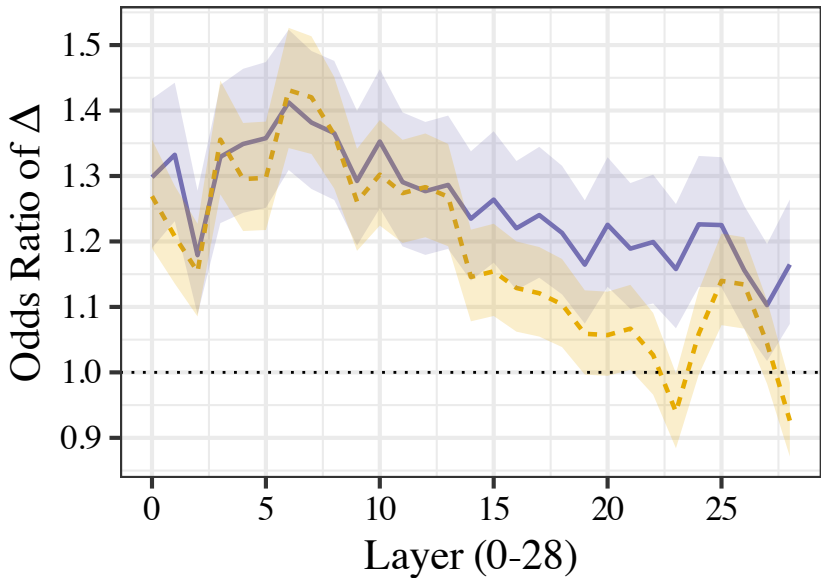

Supplement: supplementary_material [file token-sim-log-reg-qwen2.5-lm-vlm.pdf › multimodal-representations-main/plots/token-sim-log-reg-qwen2.5-lm-vlm.pdf]
